# Supplementary material for: Ribonucleotide synthesis by NME6 fuels mitochondrial gene expression
Source: PubMed Central journal article supplement (PMC10505918; doi:10.15252/embj.2022113256), 2023-07-13
Supplement: EMBJ-42-e113256-s005.pdf [file EMBJ-42-e113256-s005.pdf]

## Expanded View Figures

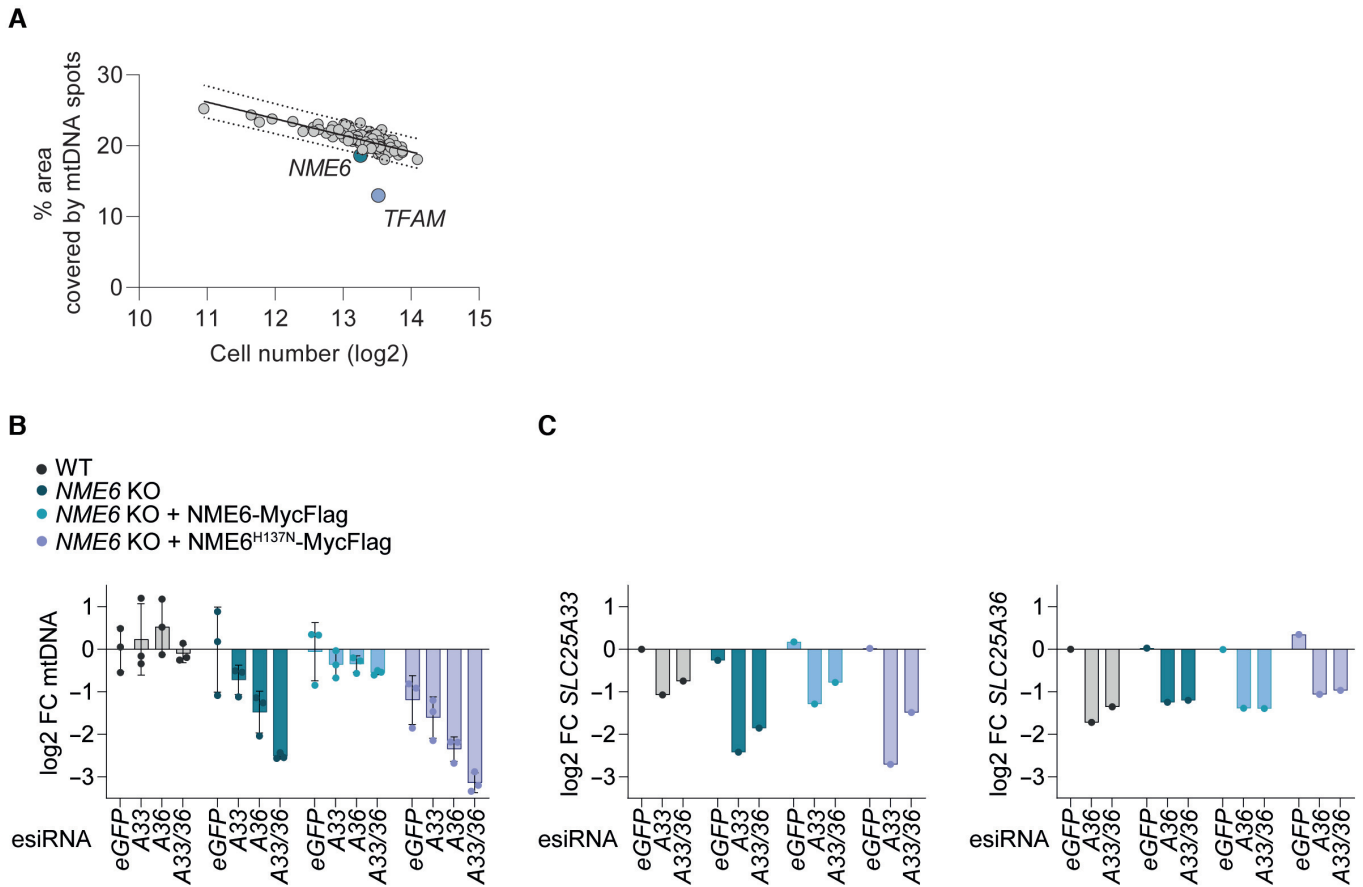

**Figure EV1. CRISPR-SpCas9 screen analysis and validation by RNA interference.**

A The result of the CRISPR-SpCas9 screen (Fig 1C) plotted as the percentage of cell cytoplasm area occupied by mtDNA spots against the mean log<sub>2</sub> cell number from each sgRNA target. The values for cells transfected with *NME6* sgRNA and *TFAM* sgRNA lie below the 95% prediction bands (least-squares regression;  $R^2 = 0.52$ ;  $n = 3$  independent experiments).

B MtDNA level monitored by qPCR (*CYTB/ACTB*) in the indicated HeLa cell lines treated with esiRNA targeting *GFP* (control), *SLC25A33* (A33), *SLC25A36* (A36) or *SLC25A33* + *SLC25A36* (A33/A36) relative to WT cells (log<sub>2</sub>;  $n = 3$  independent cultures).

C *SLC25A33* (left) and *SLC25A36* (right) transcript levels in samples from a representative experiment in (B) monitored by qRT-PCR (log<sub>2</sub>;  $n = 1$ ).

Data information: FC, fold change. Data are means  $\pm$  SD.

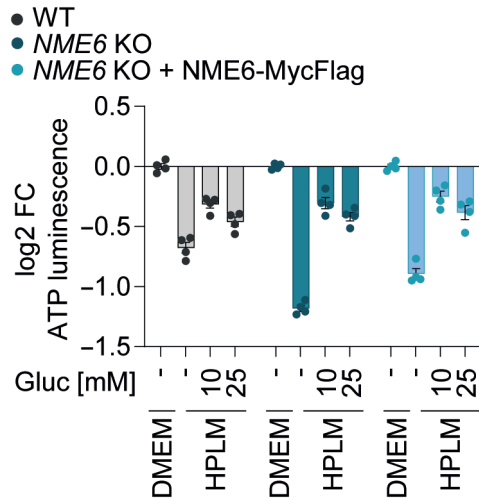

**Figure EV2. Glucose is limiting for growth in HPLM.**

Cell viability in WT, *NME6* KO and *NME6* KO + *NME6* MycFlag HeLa cells incubated in HPLM supplemented with different concentrations of glucose (standard HPLM contains 5 mM glucose). Cell viability was determined by ATP luminescence assay and analysed relative to DMEM (log<sub>2</sub>; *n* = 4 independent cultures). FC, fold change. Data are means ± SD.

**Figure EV3. Alterations to the proteome upon *NME6* depletion and further characterisation of *NME6* in liver cancer.**

- A Extended unsupervised hierarchical row clustering (Euclidean distance, complete method) representation of significantly different proteins (FDR < 0.05) (*NME6* KO vs. WT) z-scores of log<sub>2</sub>-transformed protein intensities determined by quantitative mass spectrometry and filtered for mitochondrial proteins according to MitoCarta 3.0 (Rath et al, 2021). The cluster presented in Fig 3B is visible at the top (C4). The bottom cluster (C1) is expanded here to reveal proteins that are significantly upregulated in *NME6* KO cells compared to WT and *NME6* KO + *NME6*-MycFlag HeLa cells (*n* = 4 independent cultures).
- B Relative *NME6* protein expression in cell lines across the indicated cancer types determined by quantitative proteomic profiling (Nusinow et al, 2020). Data obtained from [depmap.org/portal](http://depmap.org/portal) (solid line = median, box limits = 25<sup>th</sup> and 75<sup>th</sup> percentile and whiskers = maxima and minima).
- C Kaplan–Meier plots showing patient survival in the indicated liver hepatocellular carcinoma cohorts (LIHC) from The Cancer Genome Atlas Program (TCGA) analysed using <http://www.tcgasurvival.com>. *P*-values were determined using a log rank test (Smith & Sheltzer, 2022).
- D Stratification of the gene effect of *NME6* depletion from Fig 2A into cancer type (left, solid line = median, box limits = 25<sup>th</sup> and 75<sup>th</sup> percentile and whiskers = maxima and minima). Individual cell line *NME6* gene effects are also shown with HepG2 and Huh6 cell lines highlighted (right, note that HLE cells are not included in DepMap 22Q2 Public+Score, Chronos).
- E Immunoblot analysis of WT HLE cells, *NME6* KO cells and *NME6* KO cells expressing *NME6*-MycFlag (WT) or *NME6*<sup>H137N</sup>-MycFlag (H137N).

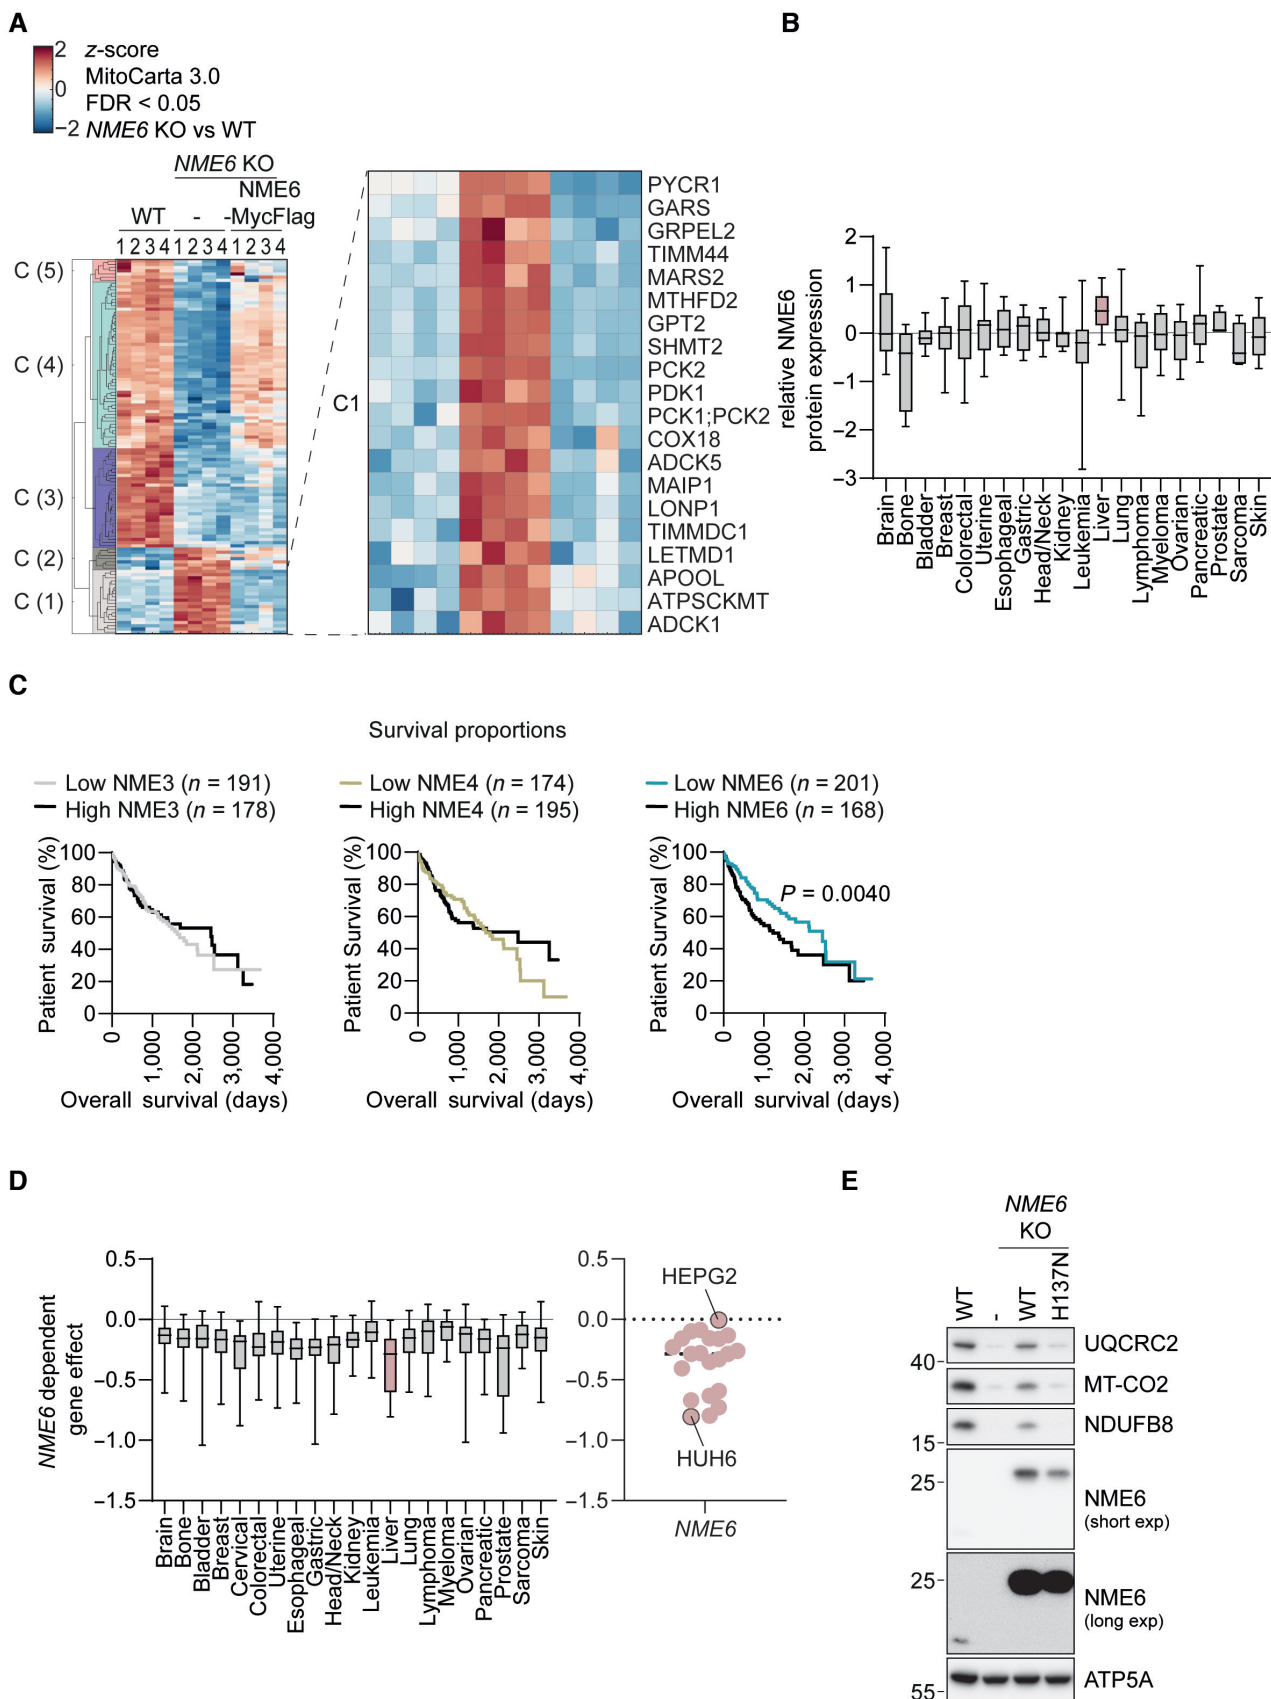

Figure EV3.

**Figure EV4. Proteomic analysis of immunoprecipitates shows interaction between NME6 and RCC1L**

- A Pan-cancer gene coessentiality network visualisation of the top 15 positively correlated genes (solid lines) and five secondary node positive interactions (dotted lines) with all NME family members (*NME1-9*) using FIREWORKS (Amici et al, 2021) (left) and *NME6* correlated genes were grouped further into manually annotated mitochondrial functions (right).
- B Representative immunoblot (left) and proteomic analysis (right) following immunoprecipitation of NME6-MycFlag from HeLa cell mitochondrial lysates using a Flag antibody ( $n = 4$  independent experiments). FC, fold change.
- C Immunoblot analysis of HeLa WT cells and two polyclonal *RCC1L* KO populations.
- D MtDNA-encoded transcript levels analysed by qRT-PCR in *NME6* KO, *NME6* KO + NME6-MycFlag and *NME6* KO H137N-MycFlag cells relative to WT HLE cells ( $\log_2$ ;  $n = 4$  independent cultures).

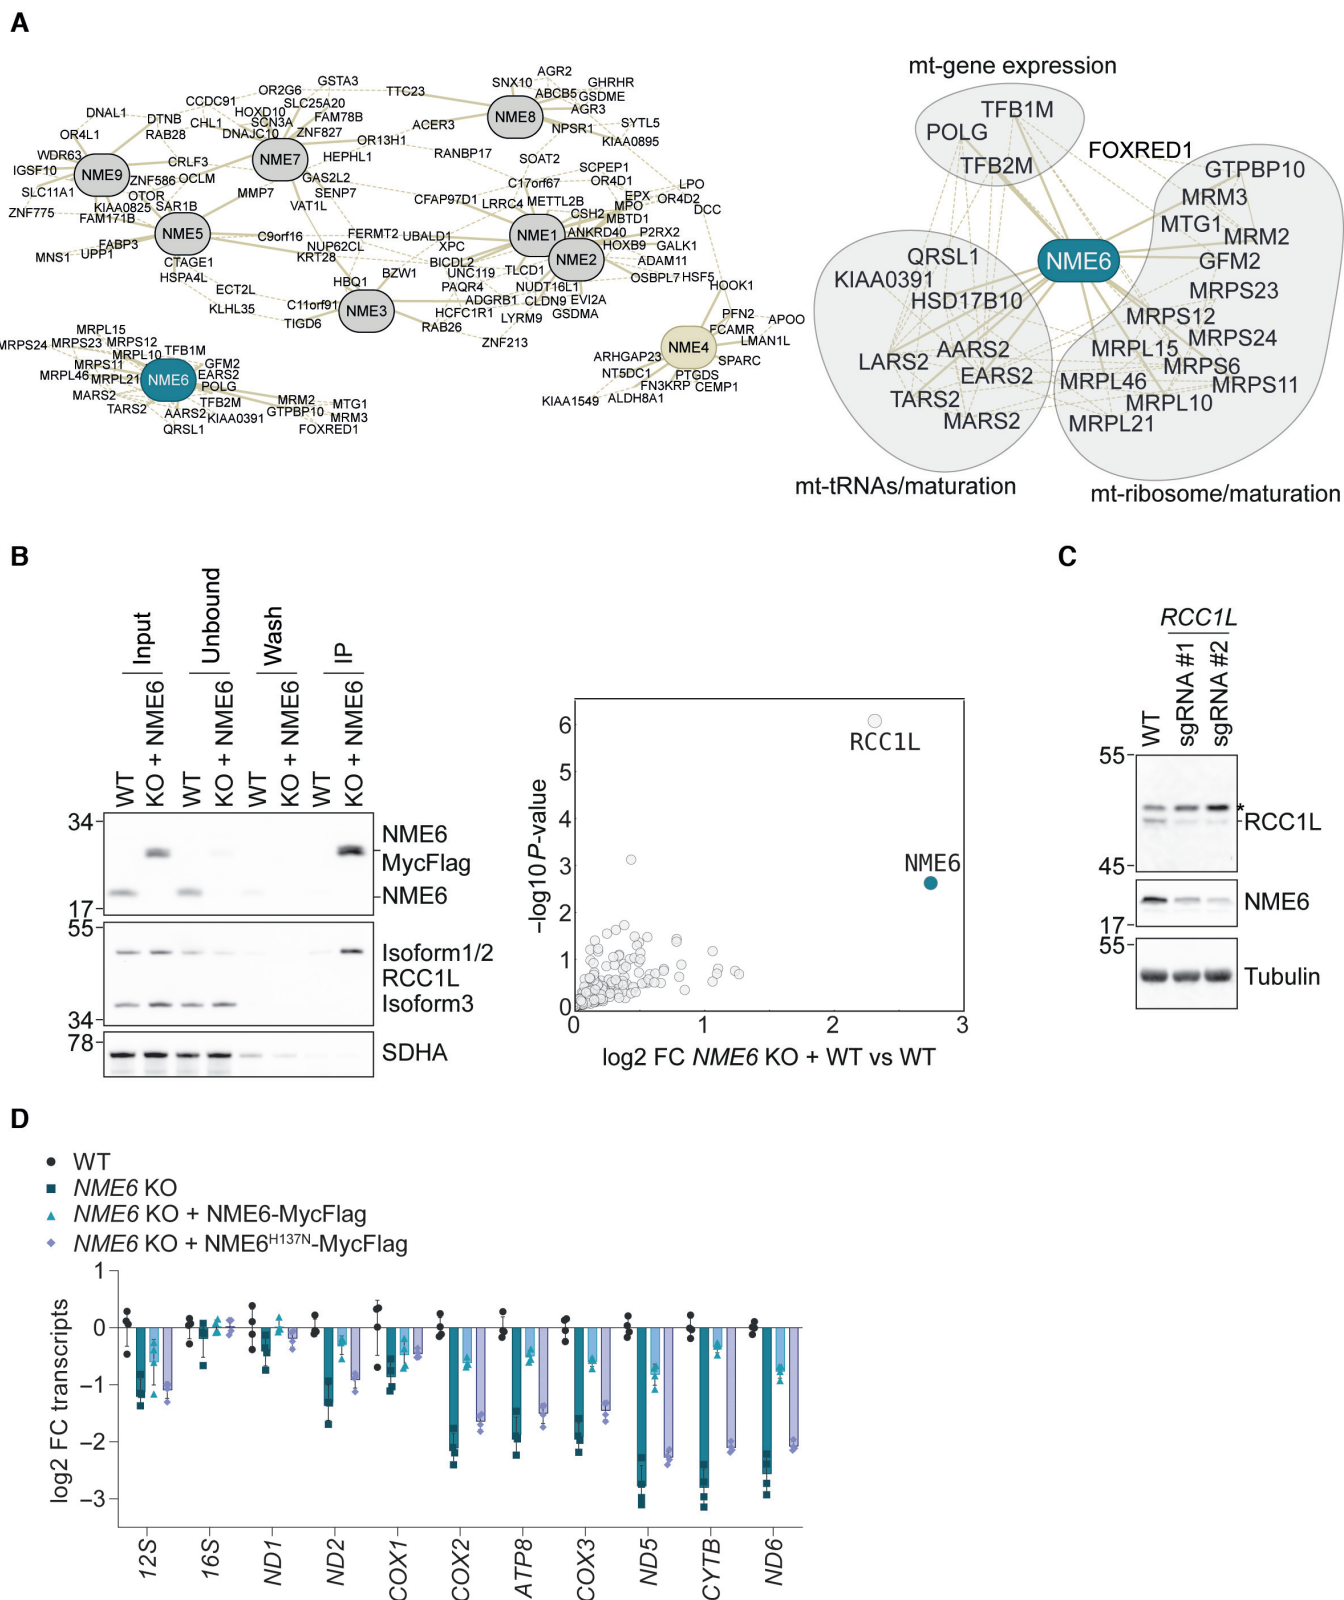

Figure EV4.

**Figure EV5. NME6 supplies pyrimidines for mitochondrial transcription and OXPHOS.**

- A Scheme of the cytosolic ribonucleotide salvage pathway.
- B *UCK2* and *NDS* transcript levels analysed by qRT-PCR in WT and *NME6* KO HeLa cells transfected with the indicated esiRNA and incubated with or without nucleosides (100  $\mu$ M) for 72 h (log<sub>2</sub>;  $n = 3$  independent cultures from Fig 5E).
- C *CYTB*, *NDS*, *APRT* and *HPRT* transcript levels analysed by qRT-PCR in WT and *NME6* KO HeLa cells transfected with the indicated esiRNA and incubated with or without nucleosides (100  $\mu$ M) for 72 h (log<sub>2</sub>;  $n = 3$  independent cultures).
- D Representative immunoblot showing the enrichment of mitochondrial proteins in crude mitochondrial fractions taken from the indicated HeLa cell lines during the isolation of mitochondria for LC-MS based metabolomics in Fig 5F. WC, whole cell; CM, crude mitochondria.
- E Mitochondrial transcript levels analysed by qRT-PCR in WT and *NME6* KO HeLa cells incubated with the indicated nucleoside species for 48 h as in Fig 5G (A, adenosine; G, guanosine; C, cytidine; U, uridine; log<sub>2</sub> transformed; 100  $\mu$ M;  $n = 4$  independent cultures).
- F The growth rates of HeLa WT and *NME6* KO cells supplemented with individual nucleosides (A, adenosine; G, guanosine; C, cytidine; U, uridine; log<sub>2</sub> transformed; 100  $\mu$ M;  $n = 6$  independent cultures).
- G Oxygen consumption rates (OCR) and extracellular acidification rates (ECAR) of WT and *NME6* KO HeLa cells incubated with or without individual nucleosides for a minimum of 120 h. Mitochondrial stress test was performed as in Fig 3A ( $n = 3$  independent experiments). The basal and maximal respiration rates shown in Fig 5H were determined from OCR measurements before injection of oligomycin and after injection of FCCP respectively (A, adenosine; G, guanosine; C, cytidine; U, uridine; 100  $\mu$ M;  $n = 3$  independent cultures).

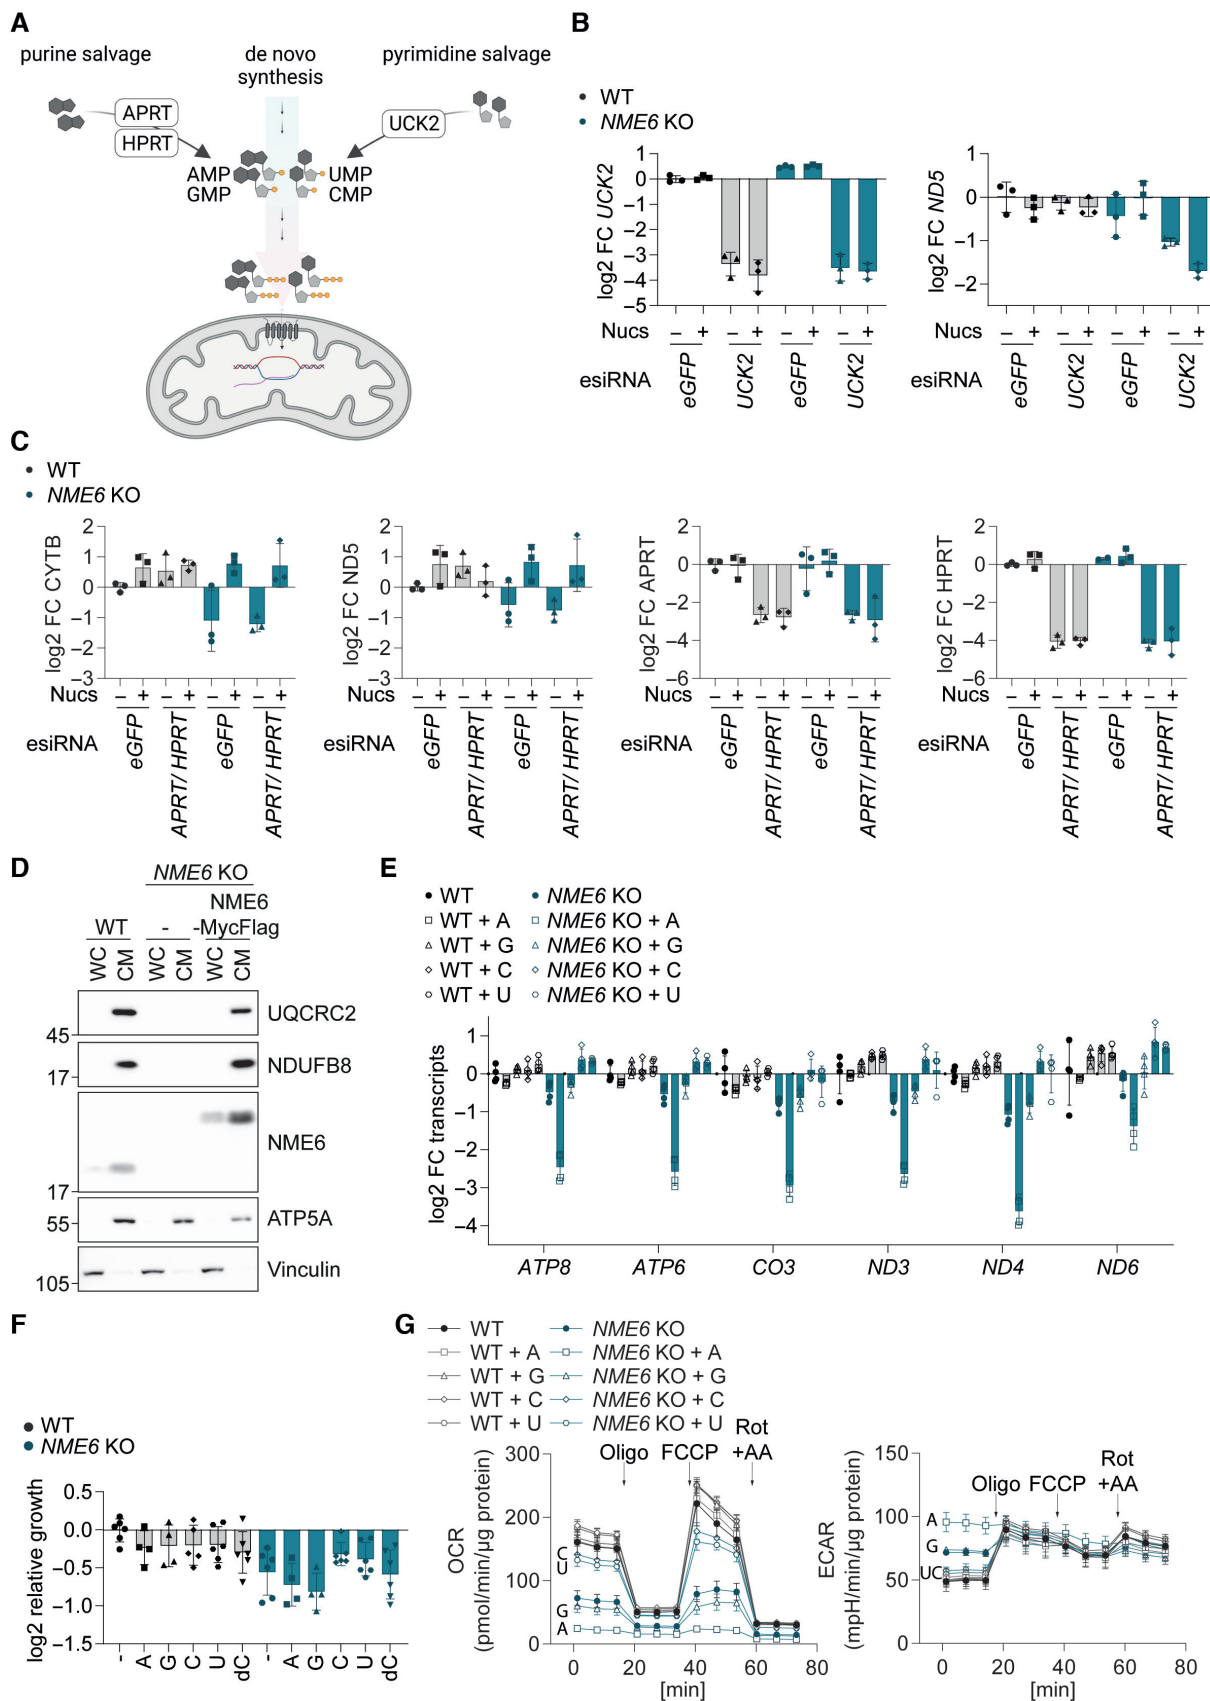

Figure EV5.
