# Supplementary material for: Ribonucleotide synthesis by NME6 fuels mitochondrial gene expression
Source: PubMed Central journal article supplement (PMC10505918; doi:10.15252/embj.2022113256), 2023-07-13
Supplement: EMBJ-42-e113256-s010.pdf [file EMBJ-42-e113256-s010.pdf]

## Table of contents

|                                 |   |
|---------------------------------|---|
| Appendix S1 .....               | 2 |
| Figure legend Appendix S1 ..... | 3 |

# Appendix S1

- WT
- *NME6* KO

A

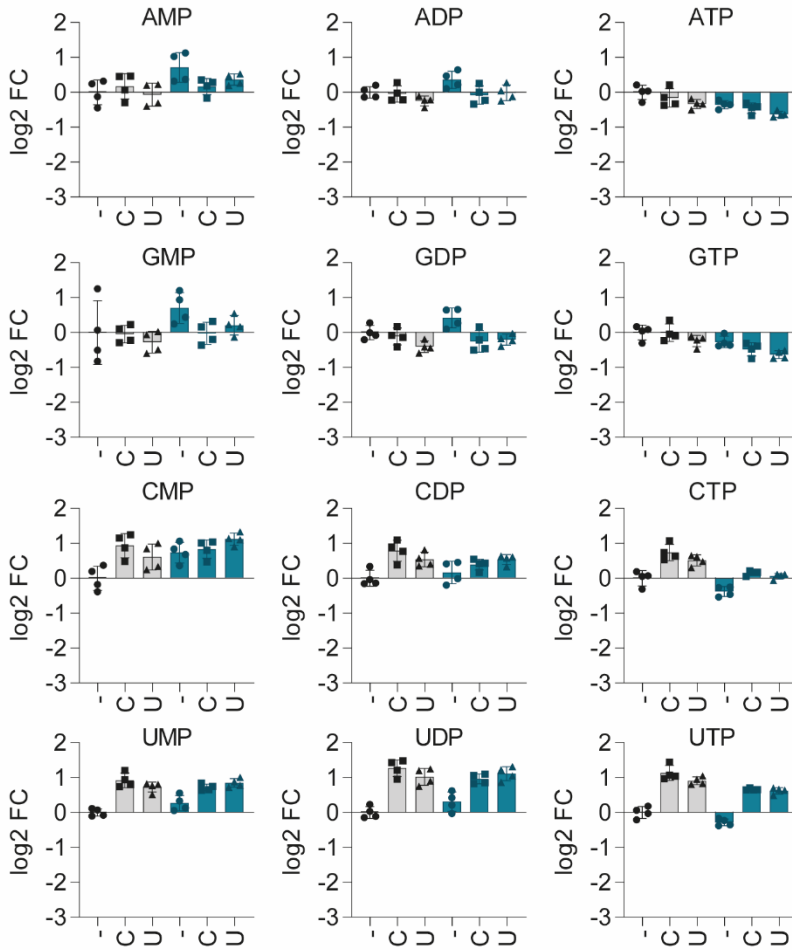

B

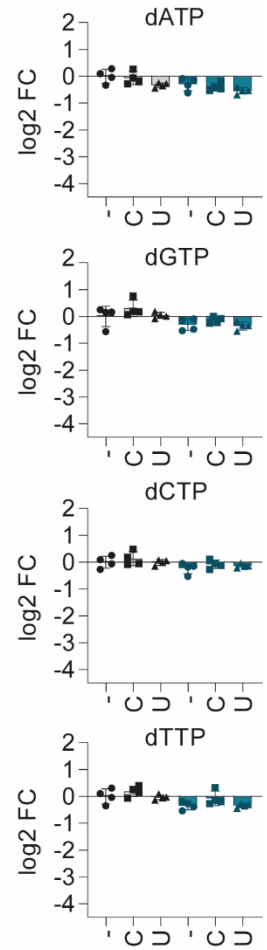

C

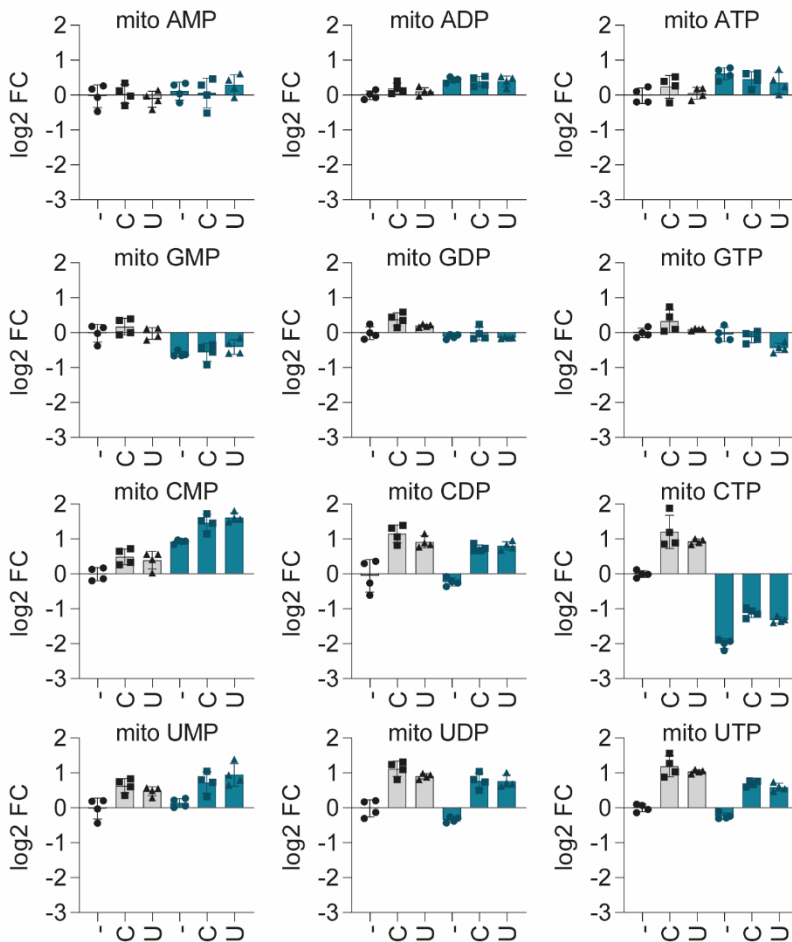

D

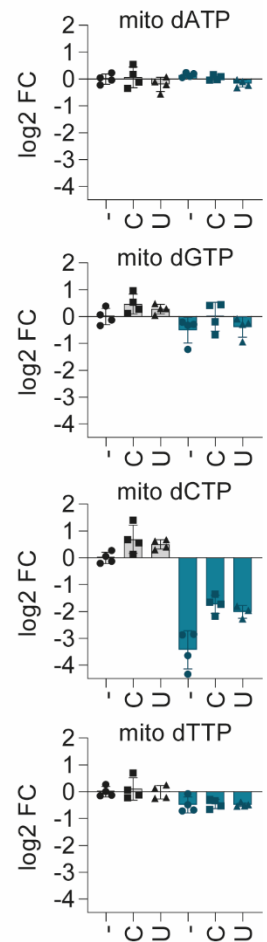

**Appendix S1 – Pyrimidine nucleoside supplementation improves nucleotide scarcity in *NME6* KO HeLa cells**

(A) Ribonucleotide levels of whole cell extracts of WT and *NME6* KO HeLa cells incubated with the indicated nucleoside species for 120 h as determined by quantitative mass spectrometry.

(B) Deoxyribonucleotide triphosphate levels of whole cell extracts of WT and *NME6* KO HeLa cells incubated with the indicated nucleoside species for 120 h as determined by quantitative mass spectrometry.

(C) Ribonucleotide levels of mitochondria enriched fractions of WT and *NME6* KO HeLa cells incubated with the indicated nucleoside species for 120 h as determined by quantitative mass spectrometry.

(D) Deoxyribonucleotide triphosphate levels of mitochondria enriched fractions of WT and *NME6* KO HeLa cells incubated with the indicated nucleoside species for 120 h as determined by quantitative mass spectrometry.

(log<sub>2</sub> fold change; n = 4 independent cultures)
